# Supplementary material
Source: Elsevier journal article supplement (https://www.sciencedirect.com/science/article/pii/S0870255121002419)
Supplement: mmc1 [file S0870255121002419:mmc1.docx]

Anexo 1

Fórmula de Friedewald (mg/dL): Colesterol total - Colesterol HDL – (Triglicéridos/5)

Fórmula de Martin-Hopkins (mg/dL): Colesterol total - Colesterol HDL – (Triglicéridos/X), em que X é um divisor numérico que varia de 3.1 a 11.9, dependendo da concentração dos triglicéridos e colesterol não-HDL (tabela 5).

| Tabela 5 - Fórmula de Martin-Hopkins : valores de triglicéridos, colesterol não-HDL e o divisor numérico para estimar o cLDL. | | | | | | |
| --- | --- | --- | --- | --- | --- | --- |
| Triglicéridos, mg/dL | Colesterol não-HDL, mg/dL | | | | | |
| <100 | 100-129 | 130-159 | 160-189 | 190-219 | ≥220 |
| 7-49 | 3.5 | 3.4 | 3.3 | 3.3 | 3.2 | 3.1 |
| 50-56 | 4.0 | 3.9 | 3.7 | 3.6 | 3.6 | 3.4 |
| 57-61 | 4.3 | 4.1 | 4.0 | 3.9 | 3.8 | 3.6 |
| 62-66 | 4.5 | 4.3 | 4.1 | 4.0 | 3.9 | 3.9 |
| 67-71 | 4.7 | 4.4 | 4.3 | 4.2 | 4.1 | 3.9 |
| 72-75 | 4.8 | 4.6 | 4.4 | 4.2 | 4.2 | 4.1 |
| 76-79 | 4.9 | 4.6 | 4.5 | 4.3 | 4.3 | 4.2 |
| 80-83 | 5.0 | 4.8 | 4.6 | 4.4 | 4.3 | 4.2 |
| 84-87 | 5.1 | 4.8 | 4.6 | 4.5 | 4.4 | 4.3 |
| 88-92 | 5.2 | 4.9 | 4.7 | 4.6 | 4.4 | 4.3 |
| 93-96 | 5.3 | 5.0 | 4.8 | 4.7 | 4.5 | 4.4 |
| 97-100 | 5.4 | 5.1 | 4.8 | 4.7 | 4.5 | 4.3 |
| 101-105 | 5.5 | 5.2 | 5.0 | 4.7 | 4.6 | 4.5 |
| 106-110 | 5.6 | 5.3 | 5.0 | 4.8 | 4.6 | 4.5 |
| 111-115 | 5.7 | 5.4 | 5.1 | 4.9 | 4.7 | 4.5 |
| 116-120 | 5.8 | 5.5 | 5.2 | 5.0 | 4.8 | 4.6 |
| 121-126 | 6.0 | 5.5 | 5.3 | 5.0 | 4.8 | 4.6 |
| 127-132 | 6.1 | 5.7 | 5.3 | 5.1 | 4.9 | 4.7 |
| 133-138 | 6.2 | 5.8 | 5.4 | 5.2 | 5.0 | 4.7 |
| 139-146 | 6.3 | 5.9 | 5.6 | 5.3 | 5.0 | 4.8 |
| 147-154 | 6.5 | 6.0 | 5.7 | 5.4 | 5.1 | 4.8 |
| 155-163 | 6.7 | 6.2 | 5.8 | 5.4 | 5.2 | 4.9 |
| 164-173 | 6.8 | 6.3 | 5.9 | 5.5 | 5.3 | 5.0 |
| 174-185 | 7.0 | 6.5 | 6.0 | 5.7 | 5.4 | 5.1 |
| 186-201 | 7.3 | 6.7 | 6.2 | 5.8 | 5.5 | 5.2 |
| 202-220 | 7.6 | 6.9 | 6.4 | 6.0 | 5.6 | 5.3 |
| 221-247 | 8.0 | 7.2 | 6.6 | 6.2 | 5.9 | 5.4 |
| 248-292 | 8.5 | 7.6 | 7.0 | 6.5 | 6.1 | 5.6 |
| 293-399 | 9.5 | 8.3 | 7.5 | 7.0 | 6.5 | 5.9 |
| 400-13975 | 11.9 | 10.0 | 8.8 | 8.1 | 7.5 | 6.7 |

Anexo 2

| Tabela 6 – Grupos da população do estudo que foram definidos segundo dados adquiridos no estudo e_COR. | |
| --- | --- |
| Grupo | Condições |
| “Sob terapêutica antidislipidémica” | - Indivíduos que responderam no questionário fazer terapêutica hipolipemiante. |
| “Sem terapêutica antidislipidémica” | - Indivíduos que responderam no questionário não fazer qualquer terapêutica hipolipemiante. |
| Diabetes *Mellitus* | - Indivíduos que responderam no questionário que tinham o diagnóstico de Diabetes *Mellitus*, que faziam antidiabéticos orais ou injetáveis, glicémia em jejum ≥ 126 mg/dL ou HbA1C ≥ 6,5%. |
| Obesidade | - Indivíduos que apresentaram Índice de Massa Corporal (IMC) ≥ 30 kg/m2. |
| Hipertrigliceridémia | - Indivíduos que apresentaram triglicéridos ≥ 150 e < 400 mg/dL. |
| cLDL-D < 70 mg/dL | - Indivíduos que apresentaram determinação direta do colesterol LDL < 70 mg/dL. |
